# Supplementary material for: Effect of Calcium and Osmotic Pretreatments on Mass Transfer and Texture Parameters during Processing of Chilacayote (Cucurbita ficifolia Bouché)
Source: Hindawi journal article supplement (doi:10.1155/2023/3873662), 2023-03-29
Supplement: f1 [file 3873662.f1.docx]

**Supplementary Table 1.** Processing conditions effect and their interactions on physical texture parameters during calcium pretreatment of chilacayote cylinders.

| **Main effects** | | | | | | | | | | | | | |
| --- | --- | --- | --- | --- | --- | --- | --- | --- | --- | --- | --- | --- | --- |
| Response variables |  | Hardness  (N) | | Cohesiveness  (adim.) | | Adhesiveness  (N mm) | | Springiness  (adim.) | | Gumminess  (N) | | Chewiness  (N) | |
| Processing parameters |
| Ca(OH)2 concentration  (g/100 mL of water) | 0.5 | * | 185 ± 34.8 | * | 0.13 ± 0.04 | * | 1.01 ± 0.80 | * | 0.38 ± 0.04 | * | 24.9 ± 10.5 | * | 9.60 ± 4.71 |
| 1.0 | 213 ± 32.0 | 0.12 ± 0.03 | 1.45 ± 0.99 | 0.38 ± 0.04 | 26.6 ± 8.42 | 10.1 ± 3.52 |
| 1.5 | 209 ± 26.1 | 0.12 ± 0.03 | 1.62 ± 0.79 | 0.39 ± 0.04 | 25.6 ± 7.09 | 10.1 ± 3.01 |
| Temperature  (°C) | 20 | * | 213 ± 40.5 | * | 0.13 ± 0.04 | * | 1.43 ± 0.93 | * | 0.39 ± 0.03 | * | 28.2 ± 10.5 | * | 11.1 ± 4.52 |
| 35 | 188 ± 28.1 | 0.15 ± 0.02 | 0.64 ± 0.49 | 0.40 ± 0.04 | 27.8 ± 5.98 | 11.0 ± 2.09 |
| 50 | 205 ± 24.6 | 0.10 ± 0.03 | 2.02 ± 0.61 | 0.36 ± 0.04 | 21.0 ± 7.30 | 7.72 ± 3.41 |
| Time  (h) | 1.5 | * | 193 ± 36.2 | * | 0.13 ± 0.02 | * | 0.73 ± 0.54 | * | 0.39 ± 0.04 | * | 24.3 ± 6.40 | * | 9.68 ± 2.81 |
| 3.0 | 203 ± 32.3 | 0.12 ± 0.04 | 1.36 ± 0.81 | 0.38 ± 0.03 | 24.4 ± 7.54 | 9.31 ± 3.15 |
| 4.5 | 210 ± 29.3 | 0.13 ± 0.04 | 1.99 ± 0.84 | 0.37 ± 0.04 | 28.3 ± 11.1 | 10.8 ± 4.98 |
| **Interactions** | | | | | | | | | | | | | |
| Ca(OH)2 conc. - Temp. |  |  | * |  | * |  | * |  | * |  | * |  | * |
| Ca(OH)2 conc. - Time |  |  | * |  | * |  | * |  | P=0.497 |  | * |  | * |
| Temp. - Time |  |  | * |  | * |  | * |  | * |  | * |  | * |
| Ca(OH)2 conc. - Temp. - Time |  |  | * |  | * |  | * |  | P=0.125 |  | * |  | * |

* Significant differences with α= 0.05

**Supplementary Table 2.** Processing conditions effect and their interactions on physical texture parameters during OD of chilacayote cylinders.

| **Main effects** | | | | | | | | | | | | | |
| --- | --- | --- | --- | --- | --- | --- | --- | --- | --- | --- | --- | --- | --- |
| Variable response |  | Hardness  (N) | | Cohesiveness  (Adim.) | | Adhesiveness  (N mm) | | Springiness  (Adim.) | | Gumminess  (N) | | Chewiness  (N) | |
| Processing parameters |
| Osmotic concentration  (°Brix) | 30 | * | 216 ± 54.5 | * | 0.06 ± 0.01 | * | 2.25 ± 0.49 | * | 0.33 ± 0.01 | * | 13.3 ± 5.30 | * | 4.42 ± 1.88 |
| 45 | 197 ± 39.3 | 0.05 ± 0.01 | 2.46 ± 0.33 | 0.32 ± 0.01 | 9.77 ± 3.04 | 3.18 ± 1.05 |
| 60 | 193 ± 37.6 | 0.05 ± 0.01 | 2.56 ± 0.26 | 0.31 ± 0.01 | 9.42 ± 2.84 | 2.88 ± 0.91 |
| Temperature  (°C) | 30 | * | 237 ± 27.0 | * | 0.06 ± 0.01 | * | 2.11 ± 0.40 | * | 0.33 ± 0.01 | * | 13.7 ± 4.19 | * | 4.58 ± 1.51 |
| 50 | 225 ± 12.5 | 0.05 ± 0.01 | 2.45 ± 0.15 | 0.32 ± 0.01 | 12.3 ± 2.41 | 3.89 ± 0.88 |
| 70 | 145 ± 7.98 | 0.05 ± 0.01 | 2.71 ± 0.31 | 0.31 ± 0.01 | 6.50 ± 0.98 | 2.02 ± 0.33 |
| **Interaction** | | | | | | | | | | | | | |
| Osmotic conc. – Temp. |  |  | * |  | P=0.727 |  | P=0.888 |  | P=0.062 |  | P=0.384 |  | P=0.441 |

* Significant differences with α= 0.05
